# Supplementary material
Source: PubMed Central journal article supplement (PMC7099102)

## Hepatic alterations associated with fine particulate matter exposure.

Tavera Busso, I.; Mateos, A. C.; González Peroni, A.; Graziani, N. S.; Carreras, H. A.

### - Supplementary Material -

SM1 - HPLC running parameters.

| Parameter                            | Configuration                                       |
|--------------------------------------|-----------------------------------------------------|
| Flow                                 | 1.500 mL min <sup>-1</sup>                          |
| Running Length                       | 23 min                                              |
| Sample Injection                     | 20 µL                                               |
| Mobile Phase Gradient                | Acetonitrile:Water (67:33) to<br>Acetonitrile (100) |
| Initial/Final Equilibration<br>Phase | 1 min                                               |
| Pre/Post Colum Temperature           | 30°C                                                |
| Flow Cell Temperature                | 45°C                                                |
| Flow Cell Sensibility                | 6                                                   |

**SM2** - PAHs retention times (min), detection parameters (nm), limits of quantification (ng mL<sup>-1</sup>) and recovery percentage (%).

| <b>Compound</b>                  | <b>Retention Time<br/>(± 0.150)</b> | <b>Detection*</b> |         | <b>Limit of<br/>Quantification</b> | <b>Recovery<br/>Percentage</b> |
|----------------------------------|-------------------------------------|-------------------|---------|------------------------------------|--------------------------------|
| Naphtalene                       | 4.553                               | FLD               | 254/331 | 0.275                              | 94.2                           |
| Acenaphtylene                    | 5.177                               | UV                | 254     | 2.394                              | 103.9                          |
| Acenaphtene + Fluorene           | 6.306                               | FLD               | 254/309 | 0.537                              | 93.4                           |
| Phenanthrene                     | 7.116                               | FLD               | 254/373 | 0.280                              | 116.6                          |
| Anthracene                       | 7.654                               | FLD               | 254/373 | 0.119                              | 83.9                           |
| Fluoranthene                     | 8.867                               | FLD               | 254/466 | 0.143                              | 103.9                          |
| Pyrene                           | 9.779                               | FLD               | 254/359 | 0.076                              | 99.8                           |
| Benzo[a]anthracene +<br>Chrysene | 11.817                              | FLD               | 254/389 | 0.096                              | 83.5                           |
| Benzo[b]fluoranthene             | 14.797                              | FLD               | 254/436 | 0.087                              | 79.1                           |
| Benzo[k]fluoranthene             | 15.243                              | FLD               | 254/436 | 0.066                              | 100.6                          |
| Benzo[a]pyrene                   | 16.404                              | FLD               | 254/402 | 0.107                              | 56.8                           |
| Dibenzo[a, h]anthracene          | 17.694                              | FLD               | 254/402 | 0.097                              | 86.3                           |
| Indene[1,2,3-c,d]pyrene          | 19.804                              | FLD               | 254/498 | 0.131                              | 102.7                          |
| Benzo[g,h,i]perylene             | 20.208                              | FLD               | 254/498 | 0.097                              | 93.0                           |

\* FLD, Fluorescence Detection; UV, Ultraviolet Detection. Fluorescence values are expressed as  
Excitation/Emission.

**SM3** - Diagnostic ratios reference values and sources.

| <b>Diagnostic Ratio</b>         | <b>Value</b> | <b>Source</b>     |
|---------------------------------|--------------|-------------------|
| Flt / (Flt + Pyr)               | 0.40 - 0.5   | Vehicular Traffic |
|                                 | > 0.5        | Coal Combustion   |
|                                 | 0.42, 0.52   | Road Dust         |
| B[ghi]P / B[a]P                 | 1.2 - 2.2    | Diesel Cars       |
|                                 | 2.5 - 3.3    | Gasoline Cars     |
|                                 | 0.86, 0.91   | Road Dust         |
| B[b]F / B[k]F                   | > 0.5        | Diesel Cars       |
|                                 | 0.21 - 0.22  | Gasoline Cars     |
| Ind / (Ind + B[ghi]P)           | 0.35 - 0.70  | Diesel Cars       |
|                                 | 0.56         | Coal Combustion   |
|                                 | 0.62         | Wood Combustion   |
|                                 | 0.36         | Road Dust         |
| Flt / Pyr                       | > 0.6        | Vehicular         |
| (Flt + B[b]F + B[k]F) / B[ghi]P | 1.60         | Diesel Cars       |
|                                 | 0.33         | Gasoline Cars     |
|                                 | 3.18         | Wood Combustion   |

SM4 - PM<sub>2.5</sub> concentration over the exposure periods. Blue line shows daily concentration and orange dotted line the exposures overall mean.

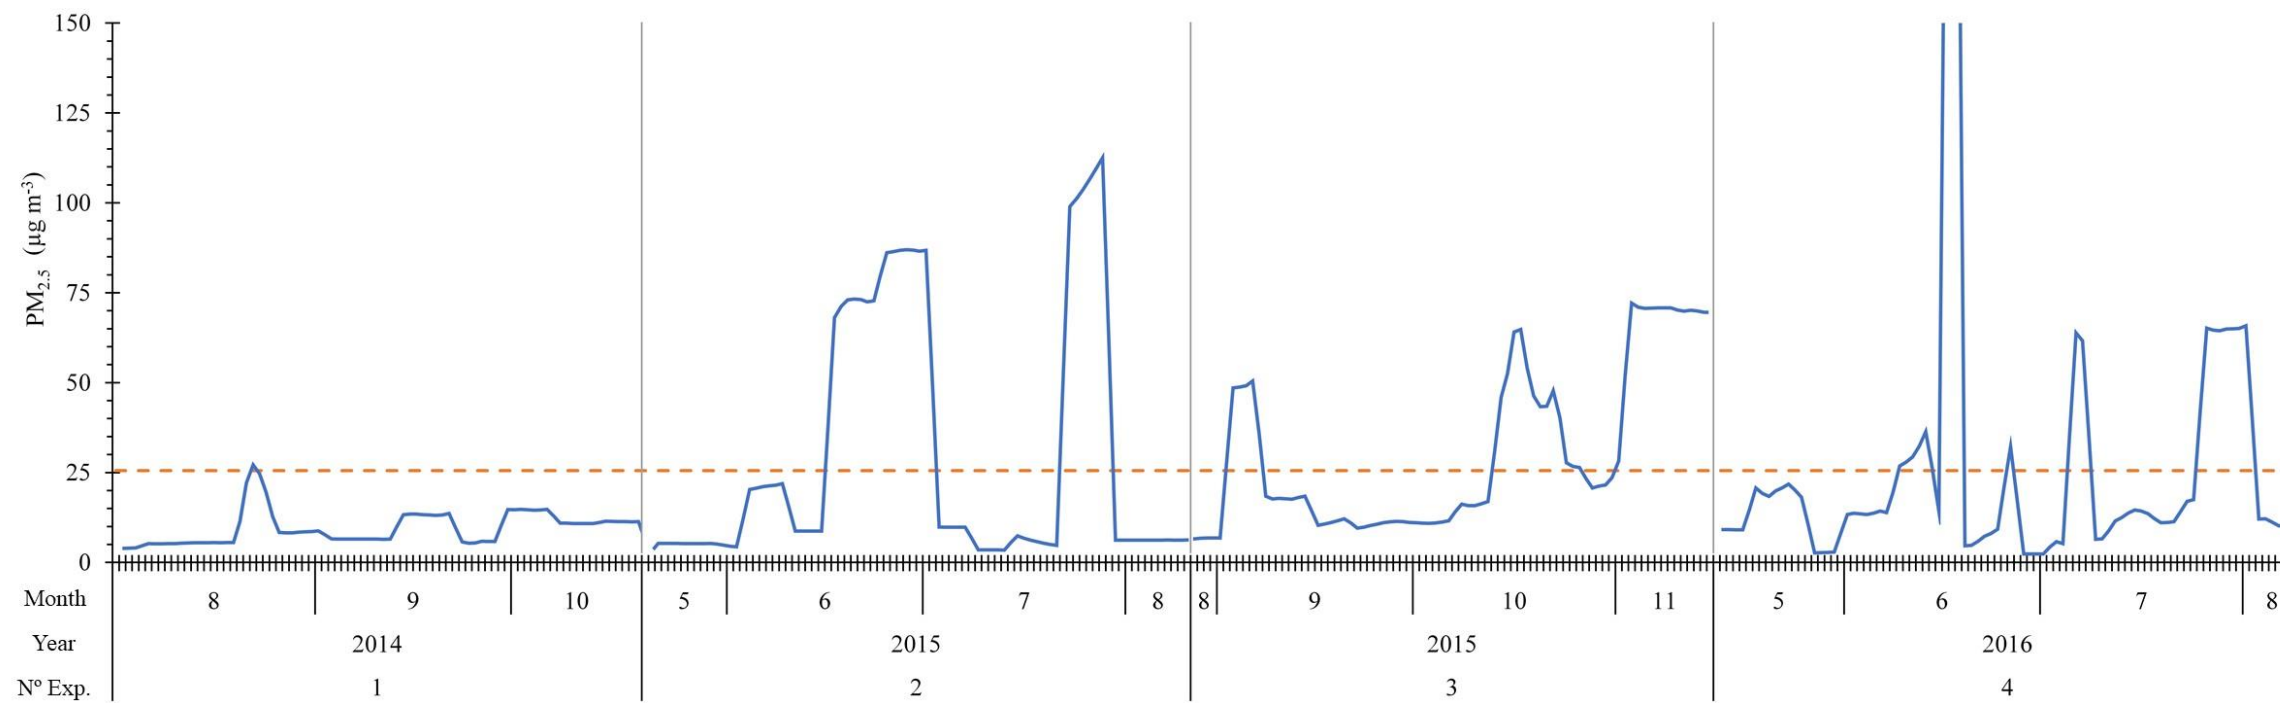

**SM5** - Vascular congestion of the lobule central vein (H/E, 100x) in a treatment (A) and a control (B) animal. Arrows indicate congested veins.

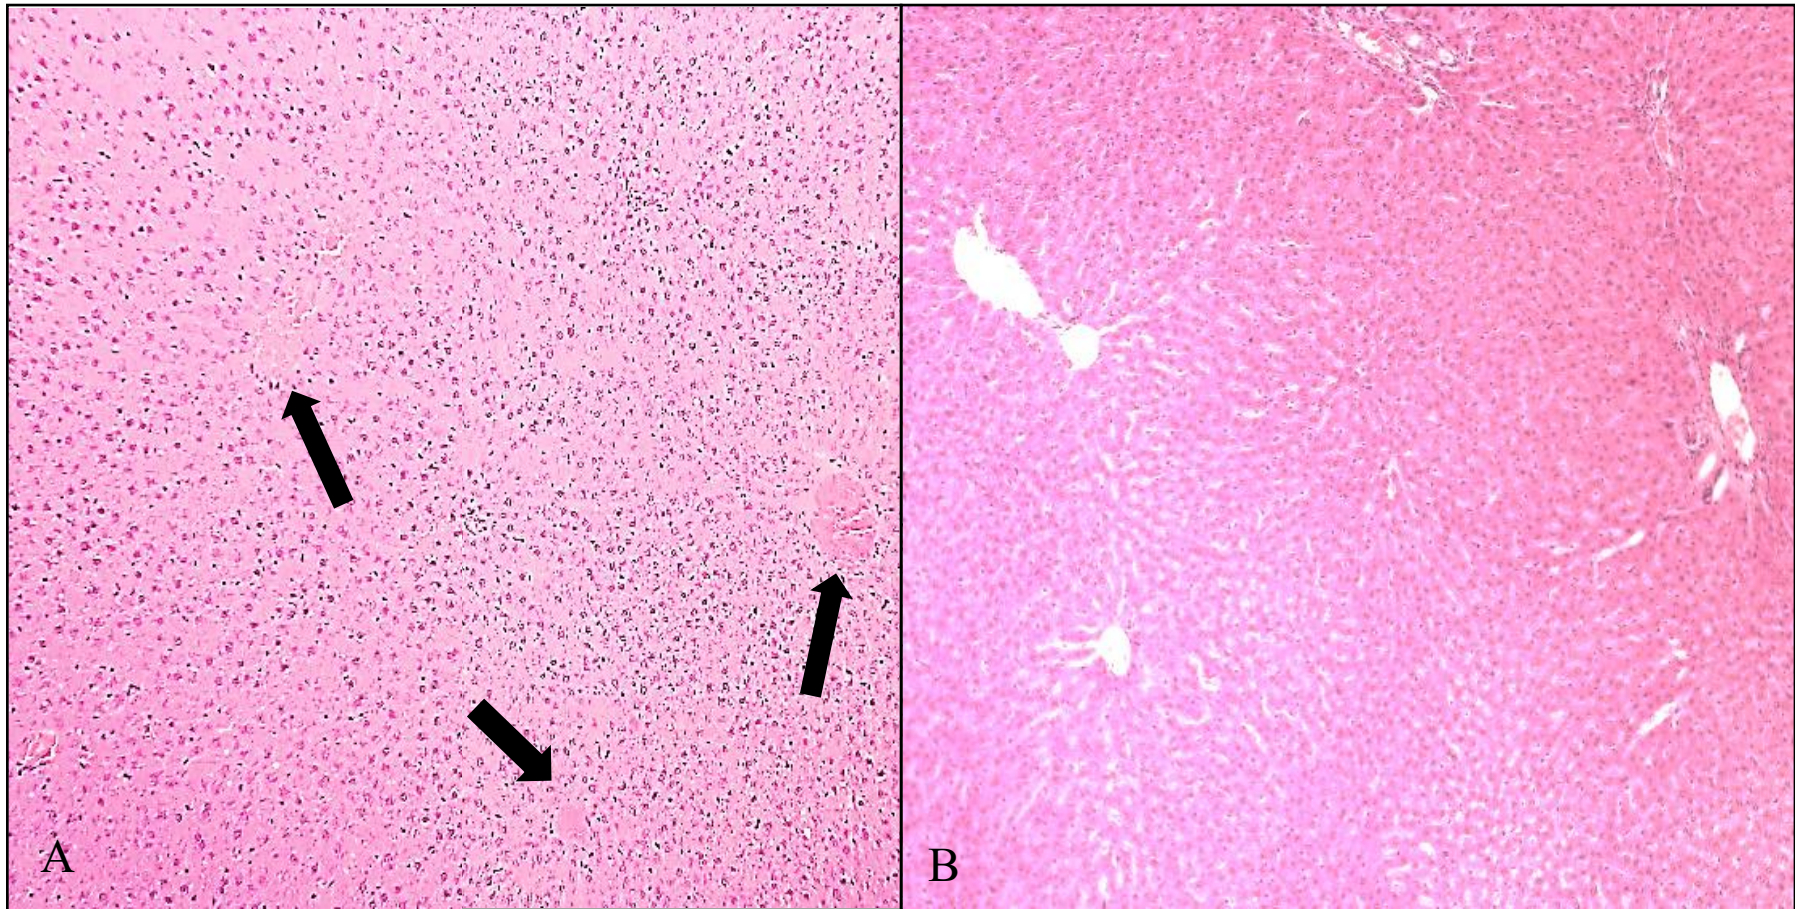



**SM6** - Carbohydrates distribution (PAS, 100x) in a treatment (A) and control (B) animal. Black arrows show the highest intensity of coloration in the centrilobular vein, indicating a carbohydrates concentration gradient contrary to what was expected. Blue arrow shows the lack of coloration due to the absence of carbohydrates.

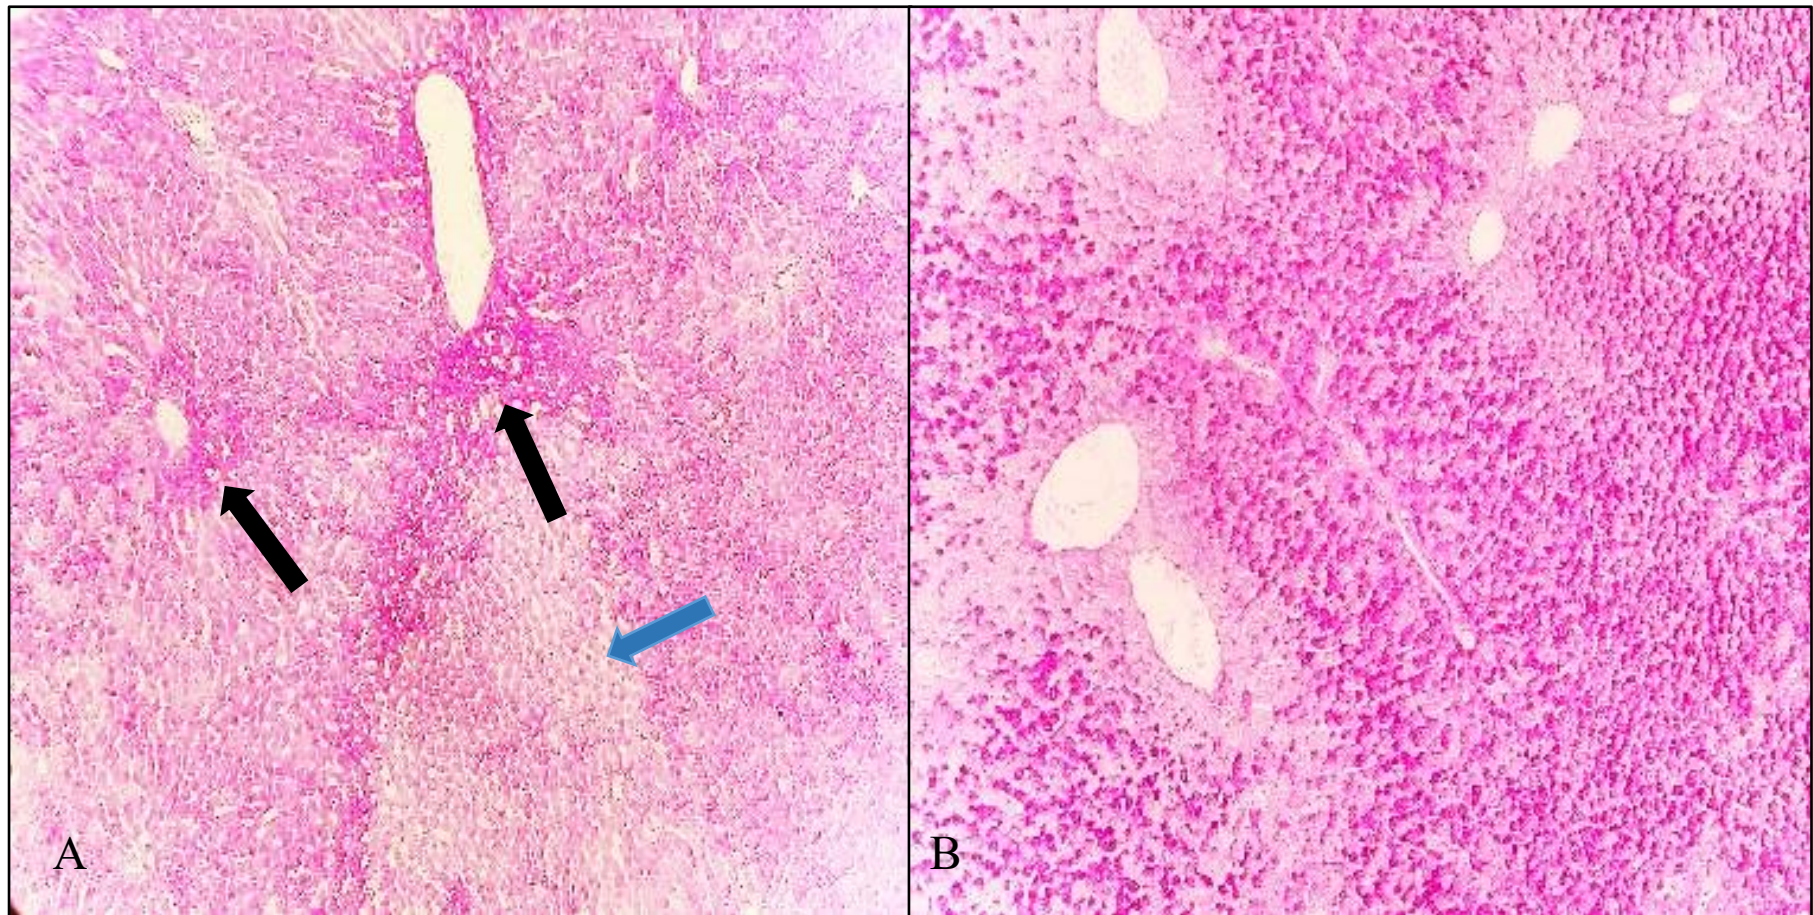

Supplement: 43188_2019_14_MOESM1_ESM.pdf [file 43188_2019_14_MOESM1_ESM.pdf]
